# Supplementary material for: Cellular NS1-BP protein interacts with the mRNA export receptor NXF1 to mediate nuclear export of influenza virus M mRNAs
Source: PubMed Central journal article supplement (PMC11570952; doi:10.1016/j.jbc.2024.107871), 2024-10-09
Supplement: mmc1.pdf [file mmc1.pdf]

# Supporting Information

## Cellular NS1-BP Protein Interacts with the mRNA Export Receptor NXF1 to Mediate Nuclear Export of Influenza Virus M mRNAs

Ke Zhang<sup>1,2\*</sup>, Tolga Cagatay<sup>1\*</sup>, Dongqi Xie<sup>1</sup>, Alexia E. Angelos<sup>3</sup>, Serena Cornelius<sup>1</sup>,  
Vasilisa Aksenova<sup>4</sup>, Sadaf Aslam<sup>5</sup>, Zhiyu He<sup>2</sup>, Matthew Esparza<sup>1</sup>, Ashley Vazhavilla<sup>1</sup>,  
Mary Dasso<sup>4</sup>, Adolfo García-Sastre<sup>5,6,7,8,9,10</sup>, Yi Ren<sup>3</sup>, Beatriz M. A. Fontoura<sup>1§</sup>

<sup>1</sup>Department of Cell Biology, University of Texas Southwestern Medical Center, Dallas, Texas 75390, USA

<sup>2</sup>Shanghai Institute of Immunity and Infection, Chinese Academy of Sciences, Shanghai 200031, China

<sup>3</sup>Department of Biochemistry, Center for Structural Biology, Vanderbilt University School of Medicine, Nashville, TN 37232, USA

<sup>4</sup>Division of Molecular and Cellular Biology, National Institute of Child Health and Human Development, National Institutes of Health,  
Bethesda, MD 20892, USA

<sup>5</sup>Department of Microbiology, Icahn School of Medicine at Mount Sinai, New York, NY 10029, USA

<sup>6</sup>Global Health and Emerging Pathogens Institute, Icahn School of Medicine at Mount Sinai, New York, NY 10029, USA

<sup>7</sup>Department of Medicine, Division of Infectious Diseases, Icahn School of Medicine at Mount Sinai, New York, NY 10029, USA

<sup>8</sup>Department of Pathology, Molecular and Cell-Based Medicine, Icahn School of Medicine at Mount Sinai, New York, NY 10029,  
USA

<sup>9</sup>The Tisch Cancer Institute, Icahn School of Medicine at Mount Sinai, New York, NY 10029, USA

<sup>10</sup>The Icahn Genomics Institute, Icahn School of Medicine at Mount Sinai, New York, NY 10029, USA

\*These authors equally contributed to the manuscript.

§Corresponding Author: Beatriz M. A. Fontoura  
([Beatriz.Fontoura@UTSouthwestern.edu](mailto:Beatriz.Fontoura@UTSouthwestern.edu))

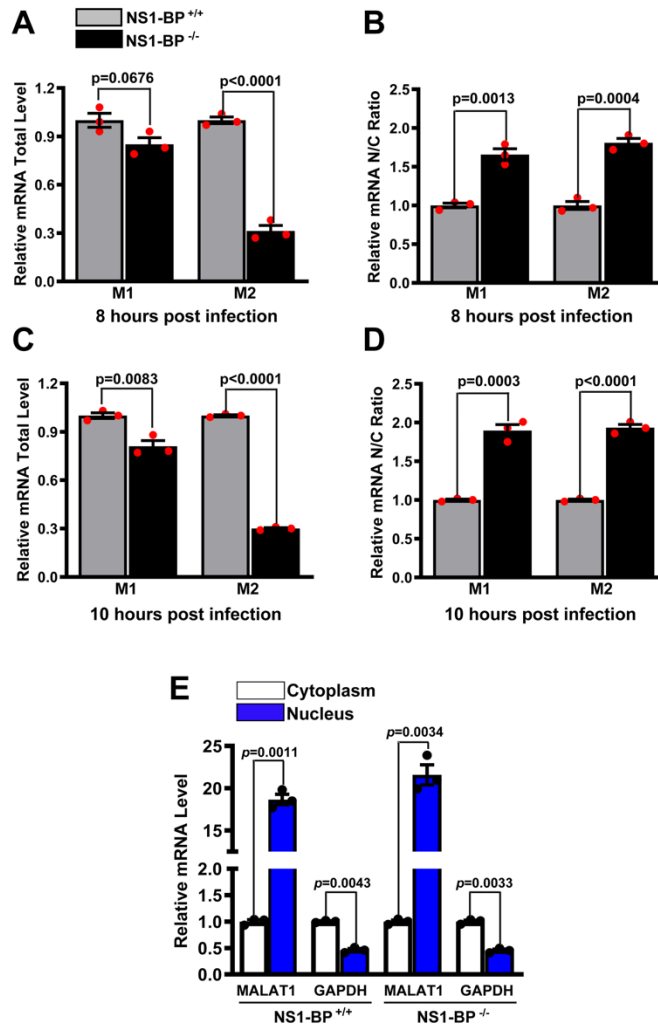

**Figure S1. NS1-BP knockout cells show down-regulation of influenza virus M1 to M2 mRNA splicing and significant retention of both mRNAs in the nucleus. A-E** NS1-BP<sup>+/+</sup> or NS1-BP<sup>-/-</sup> cells were infected with A/WSN/33 for 8 h or 10 h. **A,C**, RNA was purified from total cell lysates and qPCR was performed to determine the levels of M1 and M2 mRNAs at 8h and 10 h. **B,D**, RNA purified from nuclear and cytoplasmic fractions were subjected to qPCR to determine the levels of M1 and M2 mRNAs in each fraction as well as the levels of MALAT1 (control for nuclear fraction) and GAPDH (control for cytoplasmic fraction) shown in **E**.  $n=3$ ; \*\*\* $p<0.001$ .

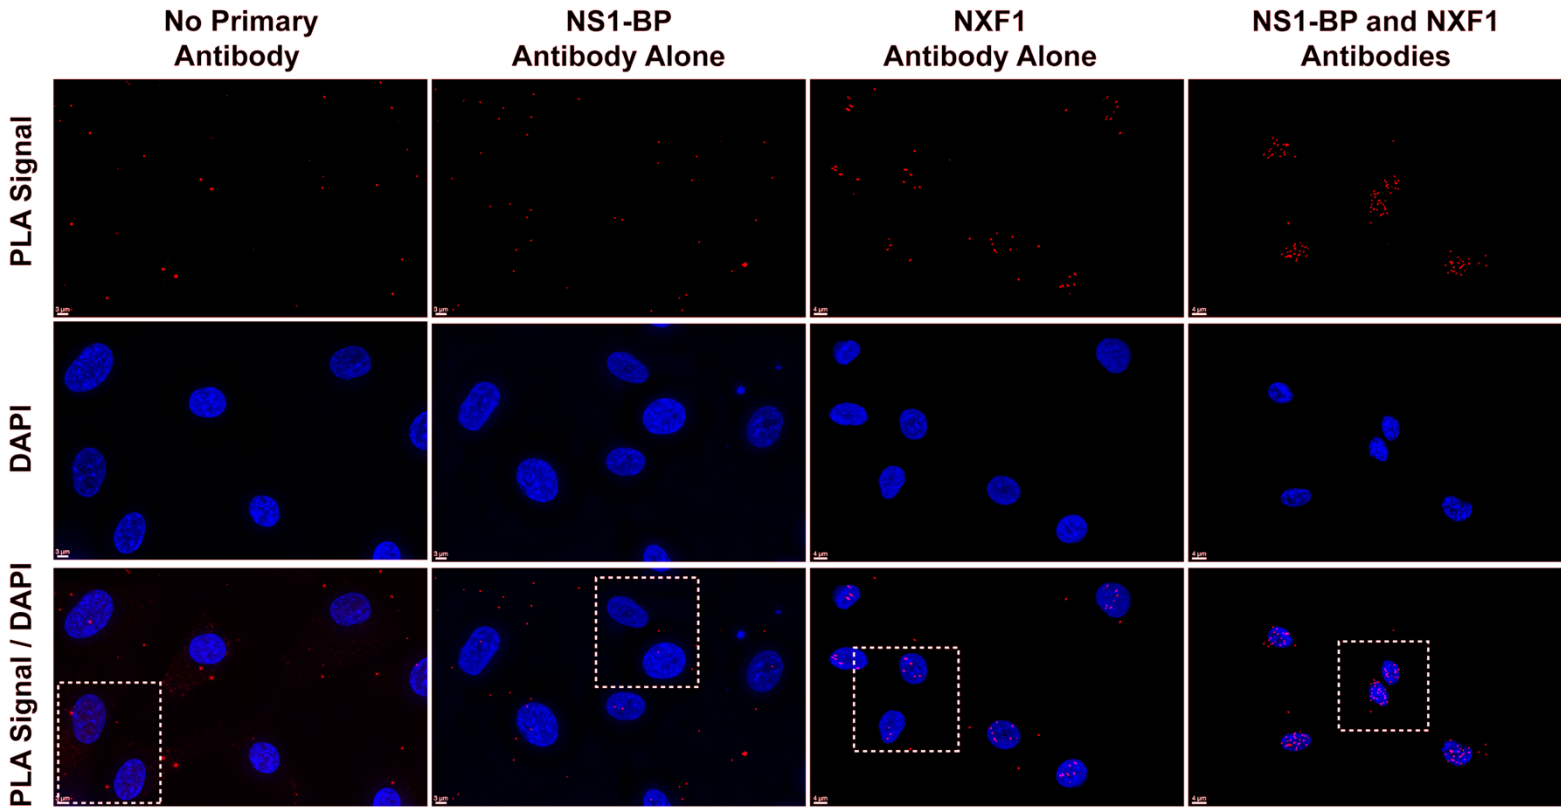

**Figure S2.** Field of view of the images shown in Figure 4. NS1-BP interaction with NXF1 occurs in the nucleus. A549 cells were subjected to Proximity Ligation Assay (PLA) to detect the interaction between NS1-BP and NXF1 proteins *in situ*. The interaction by PLA is detected by fluorescent probes (red dots;  $\lambda_{em} = 624 \text{ nm}$ , TRITC filter). Hoechst staining labels the nuclei (blue). Dashed squares are the regions shown in Figure 4. Quantification is shown in Figure 4.

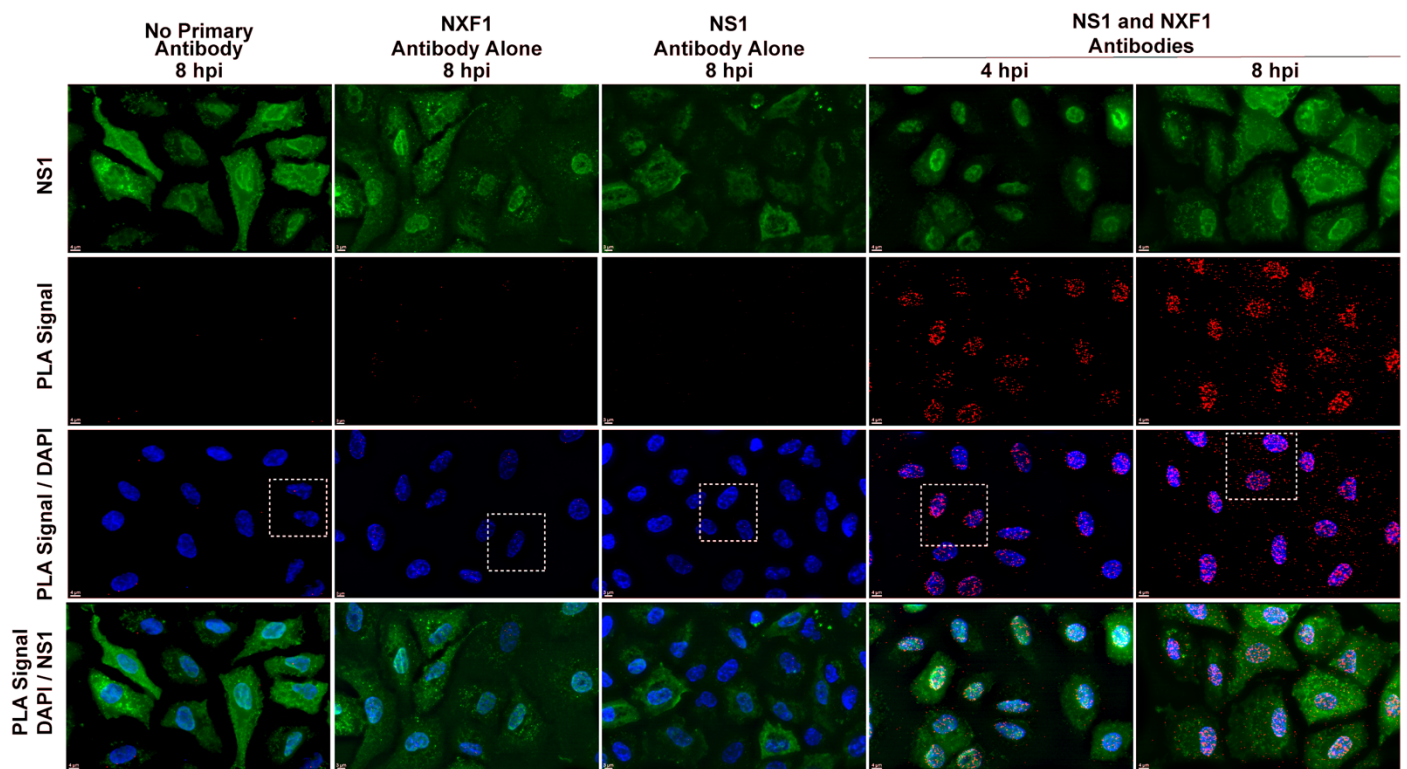

**Figure S3. Field of view of the images shown in Figure 5.** Temporospacial dynamics of NS1 and NXF1 interaction during infection. A549 cells infected with influenza virus were subjected to PLA to detect the interaction between NS1 and NXF1 proteins *in situ* at 4hpi (hours post infection) or 8hpi. The interaction by PLA is detected by fluorescent probes (red dots;  $\lambda_{em} = 624 \text{ nm}$ , TRITC filter). Hoechst staining labels the nuclei (blue). Quantification is shown in Figure 5.

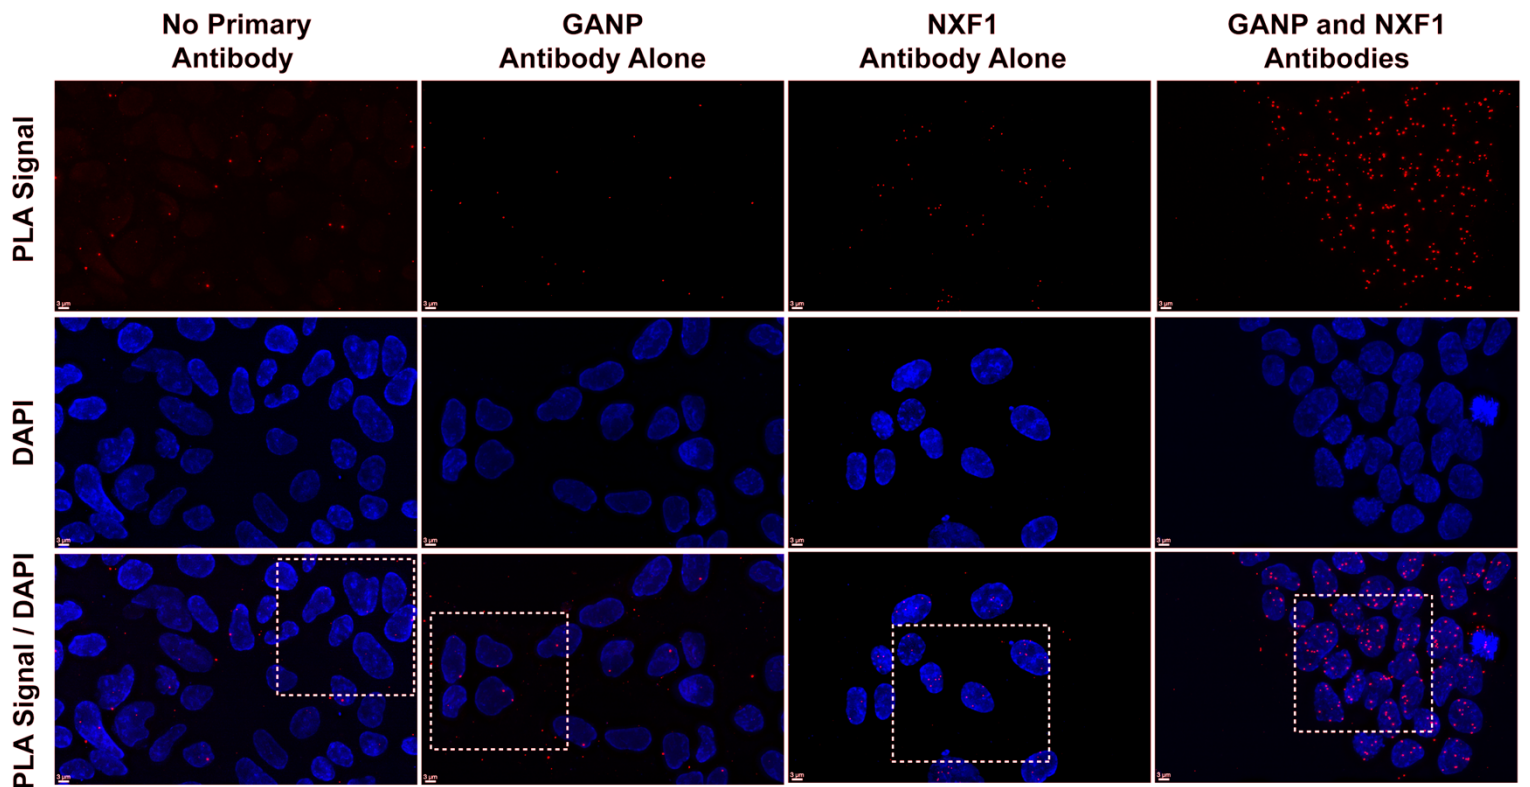

**Figure S4. Field of view of the images shown in Figure 6.** GANP and NXF1 interaction is detected in the nucleoplasm and in the nuclear periphery. DLD1-<sup>HA-AID</sup>GANP cells were subjected to PLA to detect the interaction between GANP and NXF1 proteins *in situ*. The interaction by PLA is detected by fluorescent probes (red dots;  $\lambda_{em} = 624 \text{ nm}$ , TRITC filter). Hoechst staining labels the nuclei (blue). Quantification is shown in Figure 6.

### ViewRNA IAV PA bDNA probe

| Probe # | Geneset Name             | Sequence (5'-->3')          |
|---------|--------------------------|-----------------------------|
| 1       | Influenza A Virus IAV PA | ttgtcgcaaaaatcttcatt        |
| 2       | Influenza A Virus IAV PA | gacaatcatcggattgaagca       |
| 3       | Influenza A Virus IAV PA | tgccctttccgcaagctc          |
| 4       | Influenza A Virus IAV PA | caggctctccatactcttcat       |
| 5       | Influenza A Virus IAV PA | gcaaattgtttgttgcattt        |
| 6       | Influenza A Virus IAV PA | ctccaagtgagtgcattgct        |
| 7       | Influenza A Virus IAV PA | tgaaaatctgaatacatgaagcaca   |
| 8       | Influenza A Virus IAV PA | cgcttgctcatcgatgaag         |
| 9       | Influenza A Virus IAV PA | cgccaagttctacgactattgact    |
| 10      | Influenza A Virus IAV PA | tgctcaaaagtgattggat         |
| 11      | Influenza A Virus IAV PA | ctccctcgattattcaaatctg      |
| 12      | Influenza A Virus IAV PA | gtccaggctattgtgcatct        |
| 13      | Influenza A Virus IAV PA | ctgtagtgtgcaaatactgtttact   |
| 14      | Influenza A Virus IAV PA | agaaactttggttctcagccc       |
| 15      | Influenza A Virus IAV PA | ttcttctgtaatacatacaaatctggt |
| 16      | Influenza A Virus IAV PA | tgttactccaatttcgatgaatcta   |
| 17      | Influenza A Virus IAV PA | ccagatagtatatgtgaacttctctct |
| 18      | Influenza A Virus IAV PA | tcagattaattttattggcctttt    |
| 19      | Influenza A Virus IAV PA | tgagaaaatgtggatgtgtgtcttc   |
| 20      | Influenza A Virus IAV PA | gccatttctccccagtgaa         |
| 21      | Influenza A Virus IAV PA | gagagtgtagtcggccttctgtg     |
| 22      | Influenza A Virus IAV PA | tcctagccctgcttctctcatc      |
| 23      | Influenza A Virus IAV PA | atggatgaatagcctggtttga      |
| 24      | Influenza A Virus IAV PA | cctctgctagccatttctgtctt     |
| 25      | Influenza A Virus IAV PA | tgacgaaaggaatcccagagg       |
| 26      | Influenza A Virus IAV PA | gtctcttcgctctctcggac        |
| 27      | Influenza A Virus IAV PA | ctgtgatttcaaatcttcttcaatt   |
| 28      | Influenza A Virus IAV PA | gcaagcttgccattgttc          |
| 29      | Influenza A Virus IAV PA | ggcgggagactttggtcg          |
| 30      | Influenza A Virus IAV PA | atthttcaaggctggagaagttt     |
| 31      | Influenza A Virus IAV PA | gaatccatccacataggctctaa     |
| 32      | Influenza A Virus IAV PA | ctcaatgtagccgttcggttc       |
| 33      | Influenza A Virus IAV PA | ggacatttgagaaagcttgcc       |

|    |                          |                          |
|----|--------------------------|--------------------------|
| 34 | Influenza A Virus IAV PA | ggtcaattctagcatttacttctt |
| 35 | Influenza A Virus IAV PA | gtcgtggtgttgattcaaaaaa   |
| 36 | Influenza A Virus IAV PA | gccatccggaagtctaagt      |
| 37 | Influenza A Virus IAV PA | ggaccgctgagaacagggag     |
| 38 | Influenza A Virus IAV PA | ggatccatcagcaggaatt      |
| 39 | Influenza A Virus IAV PA | tgggtcctcaatgcttaatttaa  |
| 40 | Influenza A Virus IAV PA | ggtatcccctctccctcatgact  |
| 41 | Influenza A Virus IAV PA | atgcattgattgcatcatatagc  |

### IAV NA Stellaris Probe

| Probe # | Probe (5'-> 3')      |
|---------|----------------------|
| 1       | atttaaactcctgctttcgc |
| 2       | ccaatggttattttct     |
| 3       | ttccgactaccatacagatt |
| 4       | cctattgcaatattaggct  |
| 5       | ccggttgaattgaatggct  |
| 6       | gcatattccagtatggttt  |
| 7       | gccagcaacaactttatag  |
| 8       | ttgccggttaatacactga  |
| 9       | ccacggatgggacaaagaga |
| 10      | ttgtcttgctgtgtatagc  |
| 11      | ctccttggaaaccaattct  |
| 12      | ctgcattccaagtgagaaca |
| 13      | ggcgcctgagtcagaaaaa  |
| 14      | ccttgaatgctgtcattca  |
| 15      | ataagggttctgtccttaa  |
| 16      | cgacagggcagctcattaag |
| 17      | ttgaattgtacggggacgga |
| 18      | tgaccaagcaaccgattcaa |
| 19      | cattccatcatgacatcac  |
| 20      | ggaccagaaattccgattgt |
| 21      | tttaatacagccactgctc  |
| 22      | ggttcagttattatgcggt  |
| 23      | tattctcctccaactttt   |
| 24      | ttcagactcttgtttctca  |
| 25      | catgaaccatttacacaggt |
| 26      | gccatcggtcattatggtaa |

|    |                      |
|----|----------------------|
| 27 | aaatTTgtacgaggccagc  |
| 28 | atcgatttagtaaccttccc |
| 29 | cctcgtagtgagaattaggt |
| 30 | cggtatcagggtaacaggaa |
| 31 | caattgtctctgcacacaca |
| 32 | tctaggTTTTggtcgaagga |
| 33 | cactgcagatgtatcctatt |
| 34 | cgcggtgtgcaccgaaaac  |
| 35 | aaaatcccttactccgttt  |
| 36 | acaccattgccatactata  |
| 37 | cacttttagtccttcctatc |
| 38 | tcaaaccatgtctggaact  |
| 39 | atccattaggatcccaaac  |
| 40 | aacctactatcagtctctgt |
| 41 | ccacaacatctgtctcata  |
| 42 | taccctgaccgattagttat |
| 43 | ctgtagctcaggatgttga  |
| 44 | caaggcctcatacagtctag |
| 45 | cctgattaattcaaccaga  |
| 46 | aatgatgctcccactagtc  |
| 47 | gtatcactattcacaccaca |
| 48 | gtcaatggtgaacggcaact |

### IAV PB1 Stellaris Probe

| Probe # | Probe (5'-> 3')      |
|---------|----------------------|
| 1       | gcttatagcatttTgtgctg |
| 2       | aaggagggtctccagtataa |
| 3       | ccttctgagtactgatgtg  |
| 4       | catcaatcgggttgagtgc  |
| 5       | actgggtcattgtcttctg  |
| 6       | ccattgctccaatacaca   |
| 7       | gttcaagacacgagggtctc |
| 8       | cactcgtgttgctgaaca   |
| 9       | tttagagtccagtcataggt |
| 10      | ttctattgtgttgccaatg  |



|    |                      |
|----|----------------------|
| 11 | tgaggccatttgatctgaac |
| 12 | aaggaagtctatgagccttc |
| 13 | tcattgactccattacatcc |
| 14 | gtcatattgtctctcactcg |
| 15 | caatctctgcttccttttac |
| 16 | tgccctaattagataactcc |
| 17 | tctttggcatttggttcag  |
| 18 | agtatacaaacccttatt   |
| 19 | cacatatactccttgctagt |
| 20 | aactggcaatcctgattggt |
| 21 | tccttacaacatttgccaac |
| 22 | tgtcctgagaattggatc   |
| 23 | atttgggttatctccagtg  |
| 24 | aaacatccgaggggtctgat |
| 25 | acatttctgaaccattcggg |
| 26 | ctcgccattttgttgagaa  |
| 27 | tttcatactcttgctctca  |
| 28 | aatcgatgcttgctagcatt |
| 29 | atgcagtcccatctattaag |
| 30 | catattgaacatgccatca  |
| 31 | tgtccaagattcaggatgga |
| 32 | gtaagtagtcttgggtgtgc |
| 33 | gaagattgaagaccatccca |
| 34 | gggtgcattcaaatcagag  |
| 35 | ctccatgctgaaattggcaa |
| 36 | aactccaatactcatgtccg |
| 37 | ttgctggaccaagatcattg |
| 38 | gtacgtgtacctgtaatctt |
| 39 | ttgtataaatttgggcctcc |
| 40 | agcagacttcaggaatgtgg |
| 41 | tcatccattaattcccattt |
| 42 | tcagtgggttcataaacgc  |
| 43 | agcatcatactccatgtttt |
| 44 | aagtattcctctttggctg  |
| 45 | tgcagcactttggtacatt  |
| 46 | tggtcttctgtatgaactgc |
| 47 | tcaattcgggctctggaaac |

|    |                      |
|----|----------------------|
| 48 | gctcttcaatggtggaacag |
|----|----------------------|

### IAV PB2 Stellaris Probe

| Probe # | Probe (5' -> 3')      |
|---------|-----------------------|
| 1       | cggtggttttgtgagtatc   |
| 2       | ctctgtctgctgtaattgg   |
| 3       | tctcaggaatcatttccgtt  |
| 4       | tactccataaagttgtccc   |
| 5       | gaactgtactgtcactggt   |
| 6       | tccatgtttaaccttctga   |
| 7       | ttctaaaatggacagggcca  |
| 8       | tctgcatgaccaggatttat  |
| 9       | ttccatgattacatcctgtg  |
| 10      | cccacttcgtagggaaaac   |
| 11      | tgcgattccgatgtagtat   |
| 12      | ctgggaggaatctcgtttg   |
| 13      | ttccttgggtcaaatacaac  |
| 14      | ctagtggatctgctgatact  |
| 15      | ggatgtttaccatccttatt  |
| 16      | ttgcaaataccacggcttg   |
| 17      | gatgagctaattctcagtcc  |
| 18      | gatccgctgttctcttaaa   |
| 19      | ctcatgcactcttatcttca  |
| 20      | ccaaccattgtgaactcttc  |
| 21      | atcagctgaatcaatctcct  |
| 22      | atggccacaattattgcttc  |
| 23      | gacgaaattcaggtcacctc  |
| 24      | ttggtgcatgggattcaatc  |
| 25      | cctttgcatccttctgaaaa  |
| 26      | tggattcaattccccaattt  |
| 27      | aaacggatcaatgctcaccac |
| 28      | ctcgggagacagtagtacat  |
| 29      | gttattgtcagtttctctgt  |
| 30      | ccacatcattgacgatgagt  |
| 31      | acagcattgtaggattctgg  |

|    |                       |
|----|-----------------------|
| 32 | tctaacggcctttggaacta  |
| 33 | tctcaciaaacccactgtatt |
| 34 | tcaaatgtccaagcacatc   |
| 35 | gctgcaagggagaagaagttt |
| 36 | agaactgcgttctactttgc  |
| 37 | aattgccccttacaagtatt  |
| 38 | agtggcttgtttagttga    |
| 39 | ctgggtctcagttaaaggg   |
| 40 | cagaactgcggactcaactc  |
| 41 | ctttgccagaatgaggaat   |
| 42 | cttaatgctggccatatct   |
| 43 | caaggtgctcagttcattt   |
| 44 | tgccaattagcacattag    |
| 45 | cgtttcattaccaacaccac  |
| 46 | aagtatgctagagttccggt  |
| 47 | aattgatggccatccgaatt  |
